# Supplementary material for: Survey on antibiotic regimens for necrotizing enterocolitis prescribed by Chinese pediatricians in 2020
Source: HighWire-hosted journal article supplement (doi:10.1136/wjps-2020-000253), 2021-05-01
Supplement: wjps-2020-000253supp003_data_supplement.pdf [file wjps-2020-000253supp003_data_supplement.pdf]

**Supplementary Table 3. Antibiotic duration of stage III NEC selected by physicians with different seniority levels  
(%(n/N))**

| Duration<br>(day) | <10 years<br>(n=48) | 10-20 years<br>(n=85) | >20 years<br>(n=151) | $\chi^2$ | <i>P</i> |
|-------------------|---------------------|-----------------------|----------------------|----------|----------|
| <5                | 4.2 (2/48)          | 1.2 (1/85)            | 0.7 (1/151)          |          |          |
| 5-7               | 20.8 (10/48)        | 17.6 (15/85)          | 16.6 (25/151)        |          |          |
| 7-10              | 58.3 (28/48)        | 51.8 (44/85)          | 58.3 (88/151)        | 6.217    | 0.589    |
| 10-14             | 16.7 (8/48)         | 27.1 (23/85)          | 23.2 (35/151)        |          |          |
| >14               | 0                   | 2.4 (2/85)            | 1.3 (2/151)          |          |          |

Note: Fisher exact test.
